# Supplementary material for: Association between Body Mass Index with Sugar-Sweetened and Dairy Beverages Consumption in Children from the Mexico–USA Border
Source: MDPI journal article supplement (doi:10.3390/ijerph19116403), 2022-05-25
Supplement: s1 [file s1]

# Supplementary File S1. Beverage Intake Questionnaire

## Beverage Questionnaire

### Instructions:

In the past month, please indicate your response for each beverage type by marking an "X" in the bubble for "how often" and "how much each time"

1) Indicate how often you drank the following beverages, for example, you drank 5 glasses of water per week, therefore mark 4-6 times per week

2) Indicate the approximate amount of beverage you drank each time, for example, you drank 1 cup of water 2 times per day, therefore mark 1 cup under "how much each time"

Subject ID \_\_\_\_\_

Date \_\_\_\_\_

| Type of Beverage                                                            | HOW OFTEN (MARK ONE)                                     |                       |                       |                       |                       |                       |                       | HOW MUCH EACH TIME (MARK ONE) |                       |                       |                       |                                 |
|-----------------------------------------------------------------------------|----------------------------------------------------------|-----------------------|-----------------------|-----------------------|-----------------------|-----------------------|-----------------------|-------------------------------|-----------------------|-----------------------|-----------------------|---------------------------------|
|                                                                             | Never or less than 1 time per week (go to next beverage) | 1 time per week       | 2-3 times per week    | 4-6 times per week    | 1 time per day        | 2+ times per day      | 3+ times per day      | Less than 6 fl oz (3/4 cup)   | 8 fl oz (1 cup)       | 12 fl oz (1 1/2 cups) | 16 fl oz (2 cups)     | More than 20 fl oz (2 1/2 cups) |
| Water                                                                       | <input type="radio"/>                                    | <input type="radio"/> | <input type="radio"/> | <input type="radio"/> | <input type="radio"/> | <input type="radio"/> | <input type="radio"/> | <input type="radio"/>         | <input type="radio"/> | <input type="radio"/> | <input type="radio"/> | <input type="radio"/>           |
| 100% Fruit Juice                                                            | <input type="radio"/>                                    | <input type="radio"/> | <input type="radio"/> | <input type="radio"/> | <input type="radio"/> | <input type="radio"/> | <input type="radio"/> | <input type="radio"/>         | <input type="radio"/> | <input type="radio"/> | <input type="radio"/> | <input type="radio"/>           |
| Sweetened Juice Beverage/Drink (fruit ades, lemonade, punch, Sunny Delight) | <input type="radio"/>                                    | <input type="radio"/> | <input type="radio"/> | <input type="radio"/> | <input type="radio"/> | <input type="radio"/> | <input type="radio"/> | <input type="radio"/>         | <input type="radio"/> | <input type="radio"/> | <input type="radio"/> | <input type="radio"/>           |
| 100% Vegetable Juice (V8, etc.)                                             | <input type="radio"/>                                    | <input type="radio"/> | <input type="radio"/> | <input type="radio"/> | <input type="radio"/> | <input type="radio"/> | <input type="radio"/> | <input type="radio"/>         | <input type="radio"/> | <input type="radio"/> | <input type="radio"/> | <input type="radio"/>           |
| Whole Milk                                                                  | <input type="radio"/>                                    | <input type="radio"/> | <input type="radio"/> | <input type="radio"/> | <input type="radio"/> | <input type="radio"/> | <input type="radio"/> | <input type="radio"/>         | <input type="radio"/> | <input type="radio"/> | <input type="radio"/> | <input type="radio"/>           |
| Reduced Fat Milk (2%)                                                       | <input type="radio"/>                                    | <input type="radio"/> | <input type="radio"/> | <input type="radio"/> | <input type="radio"/> | <input type="radio"/> | <input type="radio"/> | <input type="radio"/>         | <input type="radio"/> | <input type="radio"/> | <input type="radio"/> | <input type="radio"/>           |
| Low Fat/Fat Free Milk (Skim, 1%, Buttermilk, Soy milk)                      | <input type="radio"/>                                    | <input type="radio"/> | <input type="radio"/> | <input type="radio"/> | <input type="radio"/> | <input type="radio"/> | <input type="radio"/> | <input type="radio"/>         | <input type="radio"/> | <input type="radio"/> | <input type="radio"/> | <input type="radio"/>           |
| Soft Drinks, Regular                                                        | <input type="radio"/>                                    | <input type="radio"/> | <input type="radio"/> | <input type="radio"/> | <input type="radio"/> | <input type="radio"/> | <input type="radio"/> | <input type="radio"/>         | <input type="radio"/> | <input type="radio"/> | <input type="radio"/> | <input type="radio"/>           |
| Diet Soft Drinks/Artificially Sweetened Drinks (Crystal Light)              | <input type="radio"/>                                    | <input type="radio"/> | <input type="radio"/> | <input type="radio"/> | <input type="radio"/> | <input type="radio"/> | <input type="radio"/> | <input type="radio"/>         | <input type="radio"/> | <input type="radio"/> | <input type="radio"/> | <input type="radio"/>           |
| Sweetened Tea                                                               | <input type="radio"/>                                    | <input type="radio"/> | <input type="radio"/> | <input type="radio"/> | <input type="radio"/> | <input type="radio"/> | <input type="radio"/> | <input type="radio"/>         | <input type="radio"/> | <input type="radio"/> | <input type="radio"/> | <input type="radio"/>           |
| Coffee, with cream and/or sugar (includes non-dairy creamer)                | <input type="radio"/>                                    | <input type="radio"/> | <input type="radio"/> | <input type="radio"/> | <input type="radio"/> | <input type="radio"/> | <input type="radio"/> | <input type="radio"/>         | <input type="radio"/> | <input type="radio"/> | <input type="radio"/> | <input type="radio"/>           |
| Tea or Coffee, black, with/without artificial sweetener (no cream or sugar) | <input type="radio"/>                                    | <input type="radio"/> | <input type="radio"/> | <input type="radio"/> | <input type="radio"/> | <input type="radio"/> | <input type="radio"/> | <input type="radio"/>         | <input type="radio"/> | <input type="radio"/> | <input type="radio"/> | <input type="radio"/>           |
| Non-alcoholic or Light Beer                                                 | <input type="radio"/>                                    | <input type="radio"/> | <input type="radio"/> | <input type="radio"/> | <input type="radio"/> | <input type="radio"/> | <input type="radio"/> | <input type="radio"/>         | <input type="radio"/> | <input type="radio"/> | <input type="radio"/> | <input type="radio"/>           |
| Beer, Ales, Wine Coolers                                                    | <input type="radio"/>                                    | <input type="radio"/> | <input type="radio"/> | <input type="radio"/> | <input type="radio"/> | <input type="radio"/> | <input type="radio"/> | <input type="radio"/>         | <input type="radio"/> | <input type="radio"/> | <input type="radio"/> | <input type="radio"/>           |
| Hard Liquor (shots, rum, tequila, etc.)                                     | <input type="radio"/>                                    | <input type="radio"/> | <input type="radio"/> | <input type="radio"/> | <input type="radio"/> | <input type="radio"/> | <input type="radio"/> | <input type="radio"/>         | <input type="radio"/> | <input type="radio"/> | <input type="radio"/> | <input type="radio"/>           |
| Mixed Alcoholic Drinks (daiquiris, margaritas, etc.)                        | <input type="radio"/>                                    | <input type="radio"/> | <input type="radio"/> | <input type="radio"/> | <input type="radio"/> | <input type="radio"/> | <input type="radio"/> | <input type="radio"/>         | <input type="radio"/> | <input type="radio"/> | <input type="radio"/> | <input type="radio"/>           |
| Wine (red or white)                                                         | <input type="radio"/>                                    | <input type="radio"/> | <input type="radio"/> | <input type="radio"/> | <input type="radio"/> | <input type="radio"/> | <input type="radio"/> | <input type="radio"/>         | <input type="radio"/> | <input type="radio"/> | <input type="radio"/> | <input type="radio"/>           |
| Meal Replacement Shakes/Protein Drinks (Slimfast, shakes, etc.)             | <input type="radio"/>                                    | <input type="radio"/> | <input type="radio"/> | <input type="radio"/> | <input type="radio"/> | <input type="radio"/> | <input type="radio"/> | <input type="radio"/>         | <input type="radio"/> | <input type="radio"/> | <input type="radio"/> | <input type="radio"/>           |
| Energy Drinks (Red Bull, Rockstar, Full Throttle, etc.)                     | <input type="radio"/>                                    | <input type="radio"/> | <input type="radio"/> | <input type="radio"/> | <input type="radio"/> | <input type="radio"/> | <input type="radio"/> | <input type="radio"/>         | <input type="radio"/> | <input type="radio"/> | <input type="radio"/> | <input type="radio"/>           |
| Other (list):                                                               | <input type="radio"/>                                    | <input type="radio"/> | <input type="radio"/> | <input type="radio"/> | <input type="radio"/> | <input type="radio"/> | <input type="radio"/> | <input type="radio"/>         | <input type="radio"/> | <input type="radio"/> | <input type="radio"/> | <input type="radio"/>           |
| Other (list):                                                               | <input type="radio"/>                                    | <input type="radio"/> | <input type="radio"/> | <input type="radio"/> | <input type="radio"/> | <input type="radio"/> | <input type="radio"/> | <input type="radio"/>         | <input type="radio"/> | <input type="radio"/> | <input type="radio"/> | <input type="radio"/>           |

# Cuestionario de Consumo de Bebidas

**Nombre:** \_\_\_\_\_ **Fecha** \_\_\_\_\_

**Fecha de Nacimiento** \_\_\_\_\_ **Sexo** \_\_\_\_\_ **Grupo** \_\_\_\_\_

**Instrucciones:** Por favor marque con una X su respuesta en cada casilla sobre el tipo de bebida, la frecuencia de consumo y cantidad que consumió durante el mes pasado.

1. Indique la frecuencia con la que bebió las siguientes bebidas, por ejemplo, si bebió 5 vasos de agua por semana, debe marcar 4-6 veces por semana.
2. Indique la cantidad promedio aproximada de bebidas consumidas, por ejemplo, si consumió 1 taza de agua por día, marque la celda 1 taza por día.

[illegible]
