# Supplementary material for: Association between Body Mass Index with Sugar-Sweetened and Dairy Beverages Consumption in Children from the Mexico–USA Border
Source: MDPI journal article supplement (doi:10.3390/ijerph19116403), 2022-05-25
Supplement: s1 [file s1]

## Supplementary File S2. Statistical Analysis

Table S1

### Descriptive Statistics

| Age | Gender |                    | N         | Mean      |            |
|-----|--------|--------------------|-----------|-----------|------------|
|     |        |                    | Statistic | Statistic | Std. Error |
| 9   | Girls  | Weight             | 50        | 34.358    | 1.3742     |
|     |        | Height             | 50        | 1.343     | .0099      |
|     |        | zScore             | 50        | .5820     | .15277     |
|     |        | Valid N (listwise) | 50        |           |            |
|     | Boys   | Weight             | 33        | 39.676    | 2.3483     |
|     |        | Height             | 33        | 1.362     | .0117      |
|     |        | zScore             | 33        | 1.2333    | .16541     |
|     |        | Valid N (listwise) | 33        |           |            |
| 10  | Girls  | Weight             | 186       | 39.657    | .6712      |
|     |        | Height             | 186       | 1.405     | .0047      |
|     |        | zScore             | 186       | .7274     | .07935     |
|     |        | Valid N (listwise) | 186       |           |            |
|     | Boys   | Weight             | 176       | 41.225    | .8532      |
|     |        | Height             | 176       | 1.404     | .0050      |
|     |        | zScore             | 176       | .9393     | .08850     |
|     |        | Valid N (listwise) | 176       |           |            |
| 11  | Girls  | Weight             | 118       | 44.315    | .9240      |
|     |        | Height             | 118       | 1.473     | .0072      |
|     |        | zScore             | 118       | .6393     | .09025     |
|     |        | Valid N (listwise) | 118       |           |            |
|     | Boys   | Weight             | 117       | 42.921    | .9070      |
|     |        | Height             | 117       | 1.465     | .0072      |
|     |        | zScore             | 117       | .6351     | .10096     |
|     |        | Valid N (listwise) | 117       |           |            |
| 12  | Girls  | Weight             | 16        | 58.400    | 4.7754     |
|     |        | Height             | 16        | 1.521     | .0167      |
|     |        | zScore             | 16        | 1.3225    | .20615     |
|     |        | Valid N (listwise) | 16        |           |            |
|     | Boys   | Weight             | 26        | 45.131    | 2.4325     |
|     |        | Height             | 26        | 1.509     | .0185      |
|     |        | zScore             | 26        | .1723     | .27702     |
|     |        | Valid N (listwise) | 26        |           |            |

### Descriptive Statistics

| Age | Gender | NBM | EBM                | N   | Sum |
|-----|--------|-----|--------------------|-----|-----|
| 9   | Girls  | EBM | NBM_EBM            | 21  | 21  |
|     |        |     | Valid N (listwise) | 21  |     |
|     |        | NBM | NBM_EBM            | 29  | 58  |
|     |        |     | Valid N (listwise) | 29  |     |
|     | Boys   | EBM | NBM_EBM            | 20  | 20  |
|     |        |     | Valid N (listwise) | 20  |     |
| 10  | Girls  | EBM | NBM_EBM            | 92  | 92  |
|     |        |     | Valid N (listwise) | 92  |     |
|     |        | NBM | NBM_EBM            | 94  | 188 |
|     |        |     | Valid N (listwise) | 94  |     |
|     | Boys   | EBM | NBM_EBM            | 100 | 100 |
|     |        |     | Valid N (listwise) | 100 |     |
| 11  | Girls  | EBM | NBM_EBM            | 52  | 52  |
|     |        |     | Valid N (listwise) | 52  |     |
|     |        | NBM | NBM_EBM            | 66  | 132 |
|     |        |     | Valid N (listwise) | 66  |     |
|     | Boys   | EBM | NBM_EBM            | 52  | 52  |
|     |        |     | Valid N (listwise) | 52  |     |
| 12  | Girls  | EBM | NBM_EBM            | 12  | 12  |
|     |        |     | Valid N (listwise) | 12  |     |
|     |        | NBM | NBM_EBM            | 4   | 8   |
|     |        |     | Valid N (listwise) | 4   |     |
|     | Boys   | EBM | NBM_EBM            | 10  | 10  |
|     |        |     | Valid N (listwise) | 10  |     |
|     |        | NBM | NBM_EBM            | 16  | 32  |
|     |        |     | Valid N (listwise) | 16  |     |

# Table S2

| Descriptive Statistics |     |                    |           |                      |
|------------------------|-----|--------------------|-----------|----------------------|
| Gender                 | Age |                    | N         | Mean                 |
|                        |     |                    | Statistic | Statistic Std. Error |
| Girls                  | 9   | Sugar_intake       | 50        | 38.8427 7.70289      |
|                        |     | Energy             | 50        | 318.2976 62.61826    |
|                        |     | SW_B_Kcal          | 50        | 174.2754 39.62097    |
|                        |     | DB_Kcal            | 50        | 129.7950 29.09083    |
|                        |     | SF_B               | 50        | 728.5200 107.57169   |
|                        |     | SW_B_mL            | 50        | 515.2560 100.21808   |
|                        |     | DB_mL              | 50        | 225.4320 50.44319    |
|                        |     | Valid N (listwise) | 50        |                      |
|                        | 10  | Sugar_intake       | 184       | 42.4633 4.16699      |
|                        |     | Energy             | 184       | 368.0491 32.59912    |
|                        |     | SW_B_Kcal          | 184       | 181.9462 18.17906    |
|                        |     | DB_Kcal            | 184       | 173.8221 19.02059    |
|                        |     | SF_B               | 184       | 751.2587 47.78461    |
|                        |     | SW_B_mL            | 184       | 516.7435 46.88575    |
|                        |     | DB_mL              | 184       | 295.6174 33.06489    |
|                        |     | Valid N (listwise) | 184       |                      |
|                        | 11  | Sugar_intake       | 116       | 49.7579 5.80147      |
|                        |     | Energy             | 116       | 410.7847 43.81241    |
|                        |     | SW_B_Kcal          | 116       | 213.2045 24.71074    |
|                        |     | DB_Kcal            | 116       | 185.0820 25.12640    |
|                        |     | SF_B               | 116       | 855.1966 60.26130    |
|                        |     | SW_B_mL            | 116       | 586.9966 67.20302    |
|                        |     | DB_mL              | 116       | 304.2000 40.25614    |
|                        |     | Valid N (listwise) | 116       |                      |
|                        | 12  | Sugar_intake       | 16        | 39.3026 10.50938     |
|                        |     | Energy             | 16        | 290.9901 67.77902    |
|                        |     | SW_B_Kcal          | 16        | 191.7330 62.02022    |
|                        |     | DB_Kcal            | 16        | 89.3691 11.67321     |
|                        |     | SF_B               | 16        | 640.7250 143.51951   |
|                        |     | SW_B_mL            | 16        | 573.8250 185.79260   |
|                        |     | DB_mL              | 16        | 146.8500 18.71381    |
|                        |     | Valid N (listwise) | 16        |                      |
| Boys                   | 9   | Sugar_intake       | 33        | 45.3623 8.19471      |
|                        |     | Energy             | 33        | 281.3417 44.11350    |
|                        |     | SW_B_Kcal          | 33        | 189.0753 34.85209    |
|                        |     | DB_Kcal            | 33        | 77.1275 13.51280     |
|                        |     | SF_B               | 33        | 593.7818 99.56640    |
|                        |     | SW_B_mL            | 33        | 534.1091 88.88309    |
|                        |     | DB_mL              | 33        | 129.6364 21.83518    |
|                        |     | Valid N (listwise) | 33        |                      |
|                        | 10  | Sugar_intake       | 174       | 52.2634 3.55459      |
|                        |     | Energy             | 174       | 380.9978 23.61043    |
|                        |     | SW_B_Kcal          | 174       | 221.5141 15.92398    |
|                        |     | DB_Kcal            | 174       | 142.3626 13.86428    |
|                        |     | SF_B               | 174       | 710.0966 52.34386    |
|                        |     | SW_B_mL            | 174       | 654.6690 41.46318    |
|                        |     | DB_mL              | 174       | 240.3724 23.94965    |
|                        |     | Valid N (listwise) | 174       |                      |
|                        | 11  | Sugar_intake       | 117       | 57.9373 6.90800      |
|                        |     | Energy             | 117       | 442.3078 38.83258    |
|                        |     | SW_B_Kcal          | 117       | 246.6993 30.42881    |
|                        |     | DB_Kcal            | 117       | 177.7886 21.20380    |
|                        |     | SF_B               | 117       | 836.4205 58.99788    |
|                        |     | SW_B_mL            | 117       | 696.1744 72.59234    |
|                        |     | DB_mL              | 117       | 296.6154 35.56739    |
|                        |     | Valid N (listwise) | 117       |                      |
|                        | 12  | Sugar_intake       | 24        | 57.5740 12.03228     |
|                        |     | Energy             | 24        | 396.1520 60.72683    |
|                        |     | SW_B_Kcal          | 24        | 253.9444 54.84392    |
|                        |     | DB_Kcal            | 26        | 169.8458 30.33641    |
|                        |     | SF_B               | 26        | 808.2462 141.81332   |
|                        |     | SW_B_mL            | 24        | 606.9833 107.09367   |
|                        |     | DB_mL              | 26        | 279.9692 48.34926    |
|                        |     | Valid N (listwise) | 24        |                      |

### Descriptive Statistics

| NBM | EBM   | Gender       |                    | N         | Mean      |            |
|-----|-------|--------------|--------------------|-----------|-----------|------------|
|     |       |              |                    | Statistic | Statistic | Std. Error |
| EBM | Girls | Sugar_intake |                    | 175       | 44.6350   | 4.37253    |
|     |       |              | Energy             | 175       | 380.2962  | 33.18533   |
|     |       |              | SW_B_Kcal          | 175       | 190.6360  | 19.24642   |
|     |       |              | DB_Kcal            | 175       | 177.1298  | 20.35764   |
|     |       |              | SF_B               | 175       | 798.0206  | 49.89427   |
|     |       |              | SW_B_mL            | 175       | 566.3520  | 51.38856   |
|     |       |              | DB_mL              | 175       | 298.7383  | 34.89406   |
|     |       |              | Valid N (listwise) | 175       |           |            |
|     | Boys  | Sugar_intake |                    | 182       | 52.9754   | 4.42597    |
|     |       |              | Energy             | 182       | 371.1680  | 24.68885   |
|     |       |              | SW_B_Kcal          | 182       | 228.9379  | 19.85732   |
|     |       |              | DB_Kcal            | 182       | 128.7489  | 11.94662   |
|     |       |              | SF_B               | 182       | 633.8044  | 42.85952   |
|     |       |              | SW_B_mL            | 182       | 638.0088  | 49.28883   |
|     |       |              | DB_mL              | 182       | 213.2901  | 19.49494   |
|     |       |              | Valid N (listwise) | 182       |           |            |
| NBM | Girls | Sugar_intake |                    | 191       | 43.6912   | 4.16402    |
|     |       |              | Energy             | 191       | 363.3033  | 32.76774   |
|     |       |              | SW_B_Kcal          | 191       | 191.7803  | 18.81694   |
|     |       |              | DB_Kcal            | 191       | 159.0299  | 16.82467   |
|     |       |              | SF_B               | 191       | 756.3267  | 48.08438   |
|     |       |              | SW_B_mL            | 191       | 518.3497  | 48.94596   |
|     |       |              | DB_mL              | 191       | 267.1351  | 27.83945   |
|     |       |              | Valid N (listwise) | 191       |           |            |
|     | Boys  | Sugar_intake |                    | 166       | 54.8777   | 4.43325    |
|     |       |              | Energy             | 166       | 417.3674  | 28.20777   |
|     |       |              | SW_B_Kcal          | 166       | 229.3659  | 19.36093   |
|     |       |              | DB_Kcal            | 168       | 173.2217  | 16.98177   |
|     |       |              | SF_B               | 168       | 873.0643  | 56.57124   |
|     |       |              | SW_B_mL            | 166       | 671.3277  | 46.23648   |
|     |       |              | DB_mL              | 168       | 293.2571  | 29.33940   |
|     |       |              | Valid N (listwise) | 166       |           |            |

**Independent Samples Test**

|              |                             | Levene's Test for Equality of Variances |      | t-test for Equality of Means |         |                 |                 |                       |                                           |           |
|--------------|-----------------------------|-----------------------------------------|------|------------------------------|---------|-----------------|-----------------|-----------------------|-------------------------------------------|-----------|
|              |                             | F                                       | Sig. | t                            | df      | Sig. (2-tailed) | Mean Difference | Std. Error Difference | 95% Confidence Interval of the Difference |           |
|              |                             |                                         |      |                              |         |                 |                 |                       | Lower                                     | Upper     |
| Sugar_intake | Equal variances assumed     | .023                                    | .880 | -2.243                       | 712     | .025            | -9.74036        | 4.34280               | -18.26660                                 | -1.21413  |
|              | Equal variances not assumed |                                         |      | -2.242                       | 709.070 | .025            | -9.74036        | 4.34432               | -18.26962                                 | -1.21110  |
| Energy       | Equal variances assumed     | 4.601                                   | .032 | -.725                        | 712     | .469            | -21.77730       | 30.03589              | -80.74680                                 | 37.19220  |
|              | Equal variances not assumed |                                         |      | -.729                        | 686.394 | .466            | -21.77730       | 29.85276              | -80.39100                                 | 36.83640  |
| SW_B_Kcal    | Equal variances assumed     | .050                                    | .822 | -1.963                       | 712     | .050            | -37.90890       | 19.31531              | -75.83068                                 | .01288    |
|              | Equal variances not assumed |                                         |      | -1.962                       | 709.664 | .050            | -37.90890       | 19.31866              | -75.83747                                 | .01967    |
| DB_Kcal      | Equal variances assumed     | 5.537                                   | .019 | 1.049                        | 714     | .294            | 17.58837        | 16.76109              | -15.31854                                 | 50.49529  |
|              | Equal variances not assumed |                                         |      | 1.055                        | 682.933 | .292            | 17.58837        | 16.66511              | -15.13263                                 | 50.30938  |
| SF_B         | Equal variances assumed     | .466                                    | .495 | .556                         | 714     | .578            | 27.61315        | 49.67125              | -69.90601                                 | 125.13231 |
|              | Equal variances not assumed |                                         |      | .556                         | 712.024 | .579            | 27.61315        | 49.68005              | -69.92375                                 | 125.15006 |
| SW_B_mL      | Equal variances assumed     | .317                                    | .574 | -2.293                       | 712     | .022            | -112.60066      | 49.10341              | -209.00546                                | -16.19586 |
|              | Equal variances not assumed |                                         |      | -2.297                       | 711.749 | .022            | -112.60066      | 49.01771              | -208.83725                                | -16.36407 |
| DB_mL        | Equal variances assumed     | 5.792                                   | .016 | 1.079                        | 714     | .281            | 30.57162        | 28.32966              | -25.04777                                 | 86.19101  |
|              | Equal variances not assumed |                                         |      | 1.085                        | 683.984 | .278            | 30.57162        | 28.16980              | -24.73804                                 | 85.88127  |

Table S3

| Correlations |                     |                 |   |        |        |              |           |         |       |     |     |
|--------------|---------------------|-----------------|---|--------|--------|--------------|-----------|---------|-------|-----|-----|
|              |                     |                 |   | zScore | Energy | Sugar_intake | SW_B_Kcal | DB_Kcal | SF_B  |     |     |
| zScore       | Pearson Correlation | Sig. (2-tailed) | N | 1      | -.030  | -.028        | -.032     | -.032   | -.070 |     |     |
|              |                     |                 |   |        | .431   | .454         | .397      | .397    | .062  |     |     |
|              |                     |                 |   | 722    | 714    | 714          | 714       | 716     | 716   |     |     |
|              |                     |                 |   |        |        |              |           | ***     | ***   | *** | *** |

| Correlations |        |                     |                 |        |        |              |           |         |       |         |    |    |
|--------------|--------|---------------------|-----------------|--------|--------|--------------|-----------|---------|-------|---------|----|----|
| Gender       |        |                     |                 | zScore | Energy | Sugar_intake | SW_B_Kcal | DB_Kcal | SF_B  |         |    |    |
| Girls        | zScore | Pearson Correlation | Sig. (2-tailed) | N      | 1      | .011         | -.002     | -.017   | .028  | .056    |    |    |
|              |        |                     |                 |        |        | .836         | .974      | .743    | .593  | .287    |    |    |
|              |        |                     |                 |        | 370    | 366          | 366       | 366     | 366   | 366     |    |    |
|              |        |                     |                 |        |        |              |           |         | **    | **      | ** | ** |
| Boys         | zScore | Pearson Correlation | Sig. (2-tailed) | N      | 1      | -.083        | -.062     | -.054   | -.101 | -.185** |    |    |
|              |        |                     |                 |        |        | .122         | .249      | .318    | .058  | .000    |    |    |
|              |        |                     |                 |        | 352    | 348          | 348       | 348     | 350   | 350     |    |    |
|              |        |                     |                 |        |        |              |           |         | **    | **      | ** | ** |

| Gender |    |        |                     | Age             | zScore | Energy | Sugar_intake | SW_B_Kcal | DB_Kcal | SF_B  |       |     |
|--------|----|--------|---------------------|-----------------|--------|--------|--------------|-----------|---------|-------|-------|-----|
| Girls  | 9  | zScore | Pearson Correlation | Sig. (2-tailed) | N      | 1      | -.227        | -.260     | -.238   | -.136 | -.148 |     |
|        |    |        |                     |                 |        |        | .113         | .068      | .096    | .346  | .306  |     |
|        |    |        |                     |                 |        | 50     | 50           | 50        | 50      | 50    | 50    |     |
|        |    |        |                     |                 |        |        |              |           | **      | **    | **    | **  |
|        | 10 | zScore | Pearson Correlation | Sig. (2-tailed) | N      | 1      | .090         | .041      | .020    | .112  | .085  |     |
|        |    |        |                     |                 |        |        | .225         | .581      | .791    | .130  | .254  |     |
|        |    |        |                     |                 |        | 186    | 184          | 184       | 184     | 184   | 184   |     |
|        |    |        |                     |                 |        |        |              |           | ***     | ***   | ***   | *** |
|        | 11 | zScore | Pearson Correlation | Sig. (2-tailed) | N      | 1      | .014         | .049      | .053    | -.024 | .112  |     |
|        |    |        |                     |                 |        |        | .878         | .601      | .570    | .800  | .232  |     |
|        |    |        |                     |                 |        | 118    | 116          | 116       | 116     | 116   | 116   |     |
|        | 12 | zScore | Pearson Correlation | Sig. (2-tailed) | N      | 1      | -.238        | -.077     | -.221   | -.417 | .361  |     |
|        |    |        |                     |                 |        |        | .374         | .778      | .410    | .108  | .170  |     |
|        |    |        |                     |                 |        | 16     | 16           | 16        | 16      | 16    | 16    |     |

|      |    |        |                     |                 |   |     |       |       |       |         |         |    |
|------|----|--------|---------------------|-----------------|---|-----|-------|-------|-------|---------|---------|----|
| Boys | 9  | zScore | Pearson Correlation | Sig. (2-tailed) | N | 1   | -.290 | -.311 | -.301 | -.167   | -.163   |    |
|      |    |        |                     |                 |   |     | .101  | .078  | .089  | .352    | .365    |    |
|      |    |        |                     |                 |   | 33  | 33    | 33    | 33    | 33      | 33      |    |
|      |    |        |                     |                 |   |     |       |       | **    | **      | **      |    |
|      | 10 | zScore | Pearson Correlation | Sig. (2-tailed) | N | 1   | -.143 | -.058 | -.043 | -.203** | -.018   |    |
|      |    |        |                     |                 |   |     | .059  | .444  | .570  | .007    | .819    |    |
|      |    |        |                     |                 |   | 176 | 174   | 174   | 174   | 174     | 174     |    |
|      |    |        |                     |                 |   |     |       |       | **    | **      | **      | ** |
|      | 11 | zScore | Pearson Correlation | Sig. (2-tailed) | N | 1   | .095  | .033  | .037  | .131    | -.301** |    |
|      |    |        |                     |                 |   |     | .310  | .720  | .689  | .159    | .001    |    |
|      |    |        |                     |                 |   | 117 | 117   | 117   | 117   | 117     | 117     |    |
|      | 12 | zScore | Pearson Correlation | Sig. (2-tailed) | N | 1   | -.262 | -.258 | -.239 | -.325   | -.581** |    |
|      |    |        |                     |                 |   |     | .215  | .223  | .260  | .105    | .002    |    |
|      |    |        |                     |                 |   | 26  | 24    | 24    | 24    | 26      | 26      |    |

**Correlations**

| Gender | NBM | EBM          |                     | zScore  | Sugar_intake | Energy  | SW_B_Kcal | DB_Kcal | SF_B    |
|--------|-----|--------------|---------------------|---------|--------------|---------|-----------|---------|---------|
| Girls  | EBM | zScore       | Pearson Correlation | 1       | .106         | .068    | .093      | .003    | .155*   |
|        |     |              | Sig. (2-tailed)     |         | .163         | .374    | .223      | .968    | .041    |
|        |     |              | N                   | 177     | 175          | 175     | 175       | 175     | 175     |
|        |     | Sugar_intake | Pearson Correlation | .106    | 1            | .825**  | .996**    | .384**  | .300**  |
|        |     |              | Sig. (2-tailed)     | .163    |              | .000    | .000      | .000    | .000    |
|        |     |              | N                   | 175     | 175          | 175     | 175       | 175     | 175     |
|        |     | Energy       | Pearson Correlation | .068    | .825**       | 1       | .822**    | .838**  | .372**  |
|        |     |              | Sig. (2-tailed)     | .374    | .000         |         | .000      | .000    | .000    |
|        |     |              | N                   | 175     | 175          | 175     | 175       | 175     | 175     |
|        |     | SW_B_Kcal    | Pearson Correlation | .093    | .996**       | .822**  | 1         | .383**  | .297**  |
|        |     |              | Sig. (2-tailed)     | .223    | .000         | .000    |           | .000    | .000    |
|        |     |              | N                   | 175     | 175          | 175     | 175       | 175     | 175     |
|        |     | DB_Kcal      | Pearson Correlation | .003    | .384**       | .838**  | .383**    | 1       | .315**  |
|        |     |              | Sig. (2-tailed)     | .968    | .000         | .000    | .000      |         | .000    |
|        |     |              | N                   | 175     | 175          | 175     | 175       | 175     | 175     |
|        |     | SF_B         | Pearson Correlation | .155*   | .300**       | .372**  | .297**    | .315**  | 1       |
|        |     |              | Sig. (2-tailed)     | .041    | .000         | .000    | .000      | .000    |         |
|        |     |              | N                   | 175     | 175          | 175     | 175       | 175     | 175     |
|        | NBM | zScore       | Pearson Correlation | 1       | -.080        | -.049   | -.091     | -.009   | .005    |
|        |     |              | Sig. (2-tailed)     |         | .268         | .502    | .209      | .901    | .951    |
|        |     |              | N                   | 193     | 191          | 191     | 191       | 191     | 191     |
|        |     | Sugar_intake | Pearson Correlation | -.080   | 1            | .902**  | .984**    | .577**  | .516**  |
|        |     |              | Sig. (2-tailed)     | .268    |              | .000    | .000      | .000    | .000    |
|        |     |              | N                   | 191     | 191          | 191     | 191       | 191     | 191     |
|        |     | Energy       | Pearson Correlation | -.049   | .902**       | 1       | .887**    | .866**  | .519**  |
|        |     |              | Sig. (2-tailed)     | .502    | .000         |         | .000      | .000    | .000    |
|        |     |              | N                   | 191     | 191          | 191     | 191       | 191     | 191     |
|        |     | SW_B_Kcal    | Pearson Correlation | -.091   | .984**       | .887**  | 1         | .545**  | .532**  |
|        |     |              | Sig. (2-tailed)     | .209    | .000         | .000    |           | .000    | .000    |
|        |     |              | N                   | 191     | 191          | 191     | 191       | 191     | 191     |
|        |     | DB_Kcal      | Pearson Correlation | -.009   | .577**       | .866**  | .545**    | 1       | .394**  |
|        |     |              | Sig. (2-tailed)     | .901    | .000         | .000    | .000      |         | .000    |
|        |     |              | N                   | 191     | 191          | 191     | 191       | 191     | 191     |
|        |     | SF_B         | Pearson Correlation | .005    | .516**       | .519**  | .532**    | .394**  | 1       |
|        |     |              | Sig. (2-tailed)     | .951    | .000         | .000    | .000      | .000    |         |
|        |     |              | N                   | 191     | 191          | 191     | 191       | 191     | 191     |
| Boys   | EBM | zScore       | Pearson Correlation | 1       | -.126        | -.195** | -.121     | -.212** | -.239** |
|        |     |              | Sig. (2-tailed)     |         | .090         | .008    | .103      | .004    | .001    |
|        |     |              | N                   | 182     | 182          | 182     | 182       | 182     | 182     |
|        |     | Sugar_intake | Pearson Correlation | -.126   | 1            | .876**  | .995**    | .143    | .143    |
|        |     |              | Sig. (2-tailed)     | .090    |              | .000    | .000      | .054    | .055    |
|        |     |              | N                   | 182     | 182          | 182     | 182       | 182     | 182     |
|        |     | Energy       | Pearson Correlation | -.195** | .876**       | 1       | .874**    | .597**  | .121    |
|        |     |              | Sig. (2-tailed)     | .008    | .000         |         | .000      | .000    | .104    |
|        |     |              | N                   | 182     | 182          | 182     | 182       | 182     | 182     |
|        |     | SW_B_Kcal    | Pearson Correlation | -.121   | .995**       | .874**  | 1         | .135    | .163*   |
|        |     |              | Sig. (2-tailed)     | .103    | .000         | .000    |           | .069    | .028    |
|        |     |              | N                   | 182     | 182          | 182     | 182       | 182     | 182     |
|        |     | DB_Kcal      | Pearson Correlation | -.212** | .143         | .597**  | .135      | 1       | -.024   |
|        |     |              | Sig. (2-tailed)     | .004    | .054         | .000    | .069      |         | .750    |
|        |     |              | N                   | 182     | 182          | 182     | 182       | 182     | 182     |
|        |     | SF_B         | Pearson Correlation | -.239** | .143         | .121    | .163*     | -.024   | 1       |
|        |     |              | Sig. (2-tailed)     | .001    | .055         | .104    | .028      | .750    |         |
|        |     |              | N                   | 182     | 182          | 182     | 182       | 182     | 182     |
|        | NBM | zScore       | Pearson Correlation | 1       | -.072        | .023    | -.088     | .072    | .008    |
|        |     |              | Sig. (2-tailed)     |         | .360         | .773    | .258      | .352    | .916    |
|        |     |              | N                   | 170     | 166          | 166     | 166       | 168     | 168     |
|        |     | Sugar_intake | Pearson Correlation | -.072   | 1            | .810**  | .994**    | .203**  | .267**  |
|        |     |              | Sig. (2-tailed)     | .360    |              | .000    | .000      | .009    | .001    |
|        |     |              | N                   | 166     | 166          | 166     | 166       | 166     | 166     |
|        |     | Energy       | Pearson Correlation | .023    | .810**       | 1       | .786**    | .736**  | .310**  |
|        |     |              | Sig. (2-tailed)     | .773    | .000         |         | .000      | .000    | .000    |
|        |     |              | N                   | 166     | 166          | 166     | 166       | 166     | 166     |
|        |     | SW_B_Kcal    | Pearson Correlation | -.088   | .994**       | .786**  | 1         | .170*   | .263**  |
|        |     |              | Sig. (2-tailed)     | .258    | .000         | .000    |           | .028    | .001    |
|        |     |              | N                   | 166     | 166          | 166     | 166       | 166     | 166     |
|        |     | DB_Kcal      | Pearson Correlation | .072    | .203**       | .736**  | .170*     | 1       | .252**  |
|        |     |              | Sig. (2-tailed)     | .352    | .009         | .000    | .028      |         | .001    |
|        |     |              | N                   | 168     | 166          | 166     | 166       | 168     | 168     |
|        |     | SF_B         | Pearson Correlation | .008    | .267**       | .310**  | .263**    | .252**  | 1       |
|        |     |              | Sig. (2-tailed)     | .916    | .001         | .000    | .001      | .001    |         |
|        |     |              | N                   | 168     | 166          | 166     | 166       | 168     | 168     |

\*. Correlation is significant at the 0.05 level (2-tailed).

\*\*. Correlation is significant at the 0.01 level (2-tailed).
