# Supplementary material for: Association between Body Mass Index with Sugar-Sweetened and Dairy Beverages Consumption in Children from the Mexico–USA Border
Source: MDPI journal article supplement (doi:10.3390/ijerph19116403), 2022-05-25
Supplement: s1 [file s1]

# Universidad Autónoma de Baja California

## FACULTAD DE DEPORTES

UABC/2018.02-E01

Ensenada, Baja California 15 de febrero de 2018

**INVESTIGADOR: DR. LUIS MARIO GÓMEZ MIRANDA**

La Junta Académica 230 Ejercicio Físico y Salud de la Facultad de Deportes de la Universidad Autónoma de Baja California, en reunión celebrada el día 14 de febrero de 2018, revisó las recomendaciones atendidas en el protocolo de investigación y el consentimiento informado del estudio denominado: **"Hábitos alimentarios y su relación con la composición corporal en niños de primaria en México y Estados Unidos"**.

La junta académica resolvió al cumplirse con los lineamientos de la Declaración de Helsinki y los reglamentos éticos en los que se rige la Universidad Autónoma de Baja California, se dictamina como:

### **PROTOCOLO ACEPTADO PARA INTERVENCIÓN**

Se extiende la presente para los fines necesarios, quedando de usted para cualquier duda o aclaración solicitada.

**ATENTAMENTE**  
**"POR LA REALIZACIÓN PLENA DEL HOMBRE"**



**DR. ALBERTO JIMÉNEZ MALDONADO**  
Responsable de Junta Académica de Ejercicio Físico y Salud  
Universidad Autónoma de Baja California

UNIVERSIDAD AUTÓNOMA  
DE BAJA CALIFORNIA

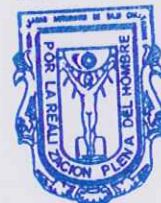

FACULTAD DE  
DEPORTES
